# Supplementary material for: Estimating the human mutation rate from autozygous segments reveals population differences in human mutational processes
Source: PubMed Central journal article supplement (PMC5566399; doi:10.1038/s41467-017-00323-y), 2017-08-21
Supplement: 41467_2017_323_MOESM1_ESM.pdf [file 41467_2017_323_MOESM1_ESM.pdf]

File Name: Supplementary Information

Description: Supplementary Figures, Supplementary Tables and Supplementary Notes.

File Name: Supplementary Data 1

Description: De novo mutations seen in autozygous sequences, PJI Complete Genomics Trios and Scottish Family Health Study, along with their comparisons with the ExAC consortium datasets and partition into mutational spectra.

File Name: Peer Review File

Description:

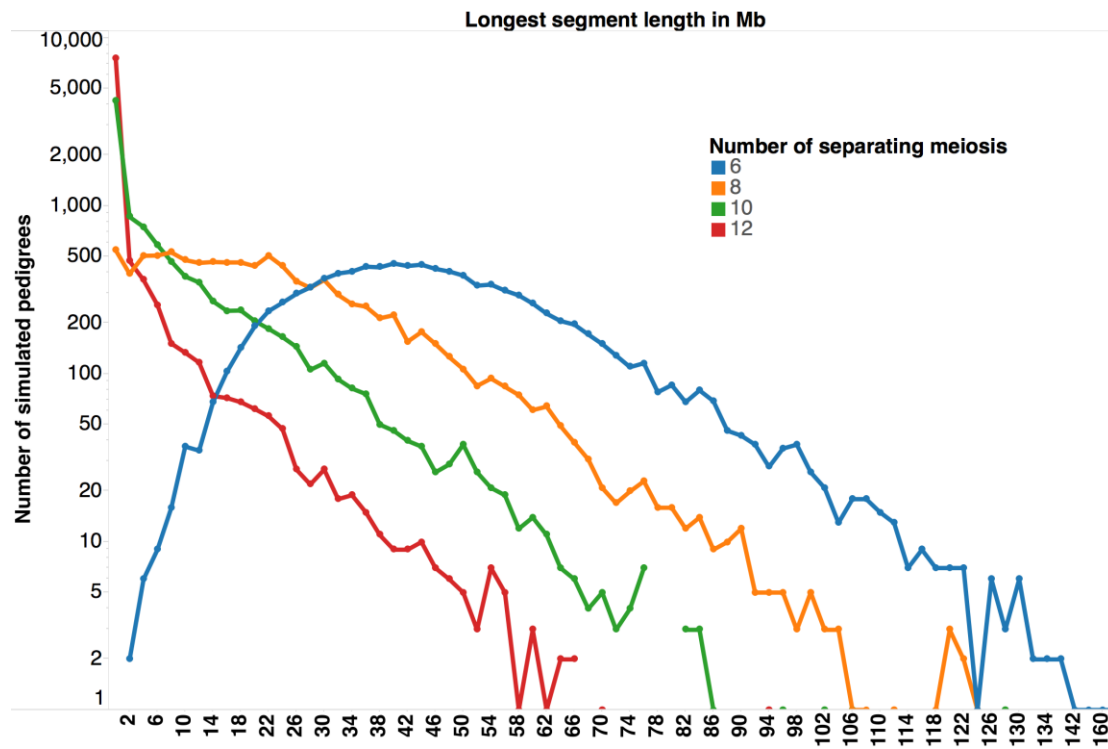

**Supplementary Figure 1.** Simulated data of showing histograms of the number of pedigrees for which the longest autozygous segment found is of a certain length. Beyond a separation of 10 meioses to the tMRCA, there are fewer than 8% of pedigrees that have an autozygous segment of at least 10Mb.

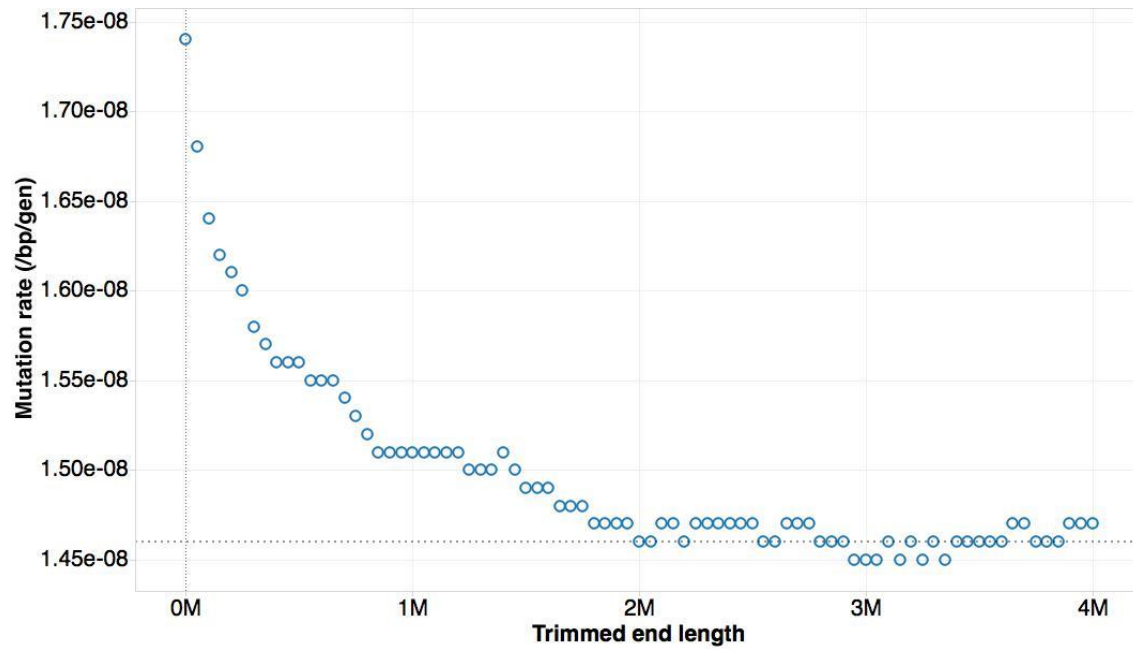

**Supplementary Figure 2.** The mutation rate estimated from autozygous segments at least 10Mb long that have been further trimmed from each end at a distance given on the x-axis. We see that there is minimal change to the mutation rate estimate beyond 2Mbs of trimming.

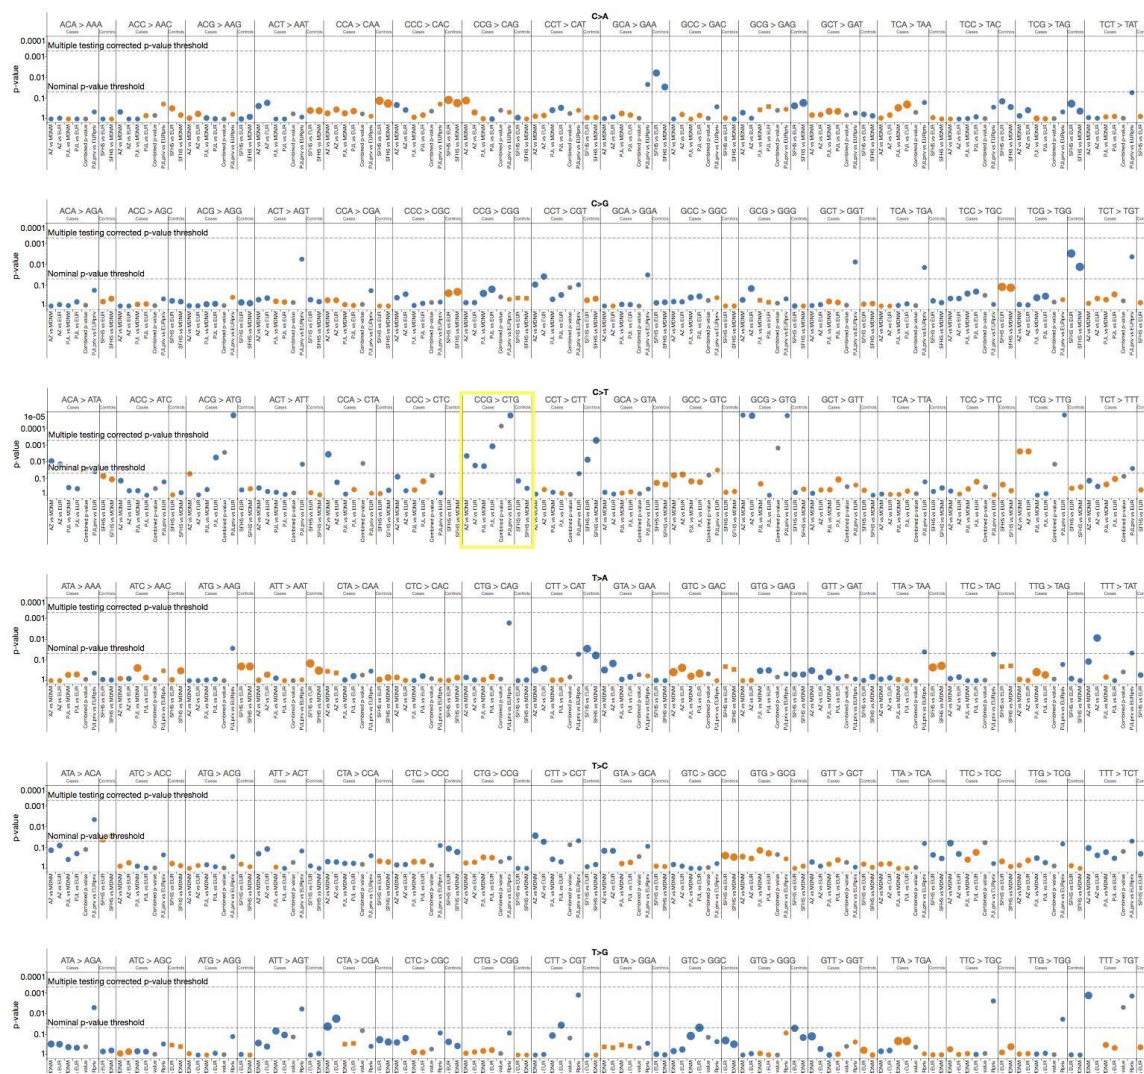

**Supplementary Figure 3.** Comparisons of the proportion of each of the 96 tri-nucleotide signatures across datasets. Differences in context-specific mutation rate. y-axis: significance of the difference in proportion of DNMs for each signature between 1152 mutations from the autozygosity dataset (AZ) and 850 DNMs from the Complete Genomics trio dataset (PJL) in comparison with 6948 mutations from the meta-analysis dataset (MDNM) and mutations private to Europeans in the 1000 Genomes Project (EURpriv). Additional comparisons for mutations private to the PJL population from the 1000 Genomes Project (PJLpriv) and private to Europeans (EURpriv) shown in rightmost panel. As controls significance of the difference in 747 DNMs from the Scottish Family Health Study (SFHS); Colors (Orange, first population has a lower proportion, Blue, otherwise) and size reflect the sign and fold difference of the test. Comparisons for which de novo mutations have 0 counts shown in squares. The only tri-nucleotide context, 5' CCG → CTG 3' that shows experiment wide significance, and consistent direction of effect shown in yellow box.

**a**

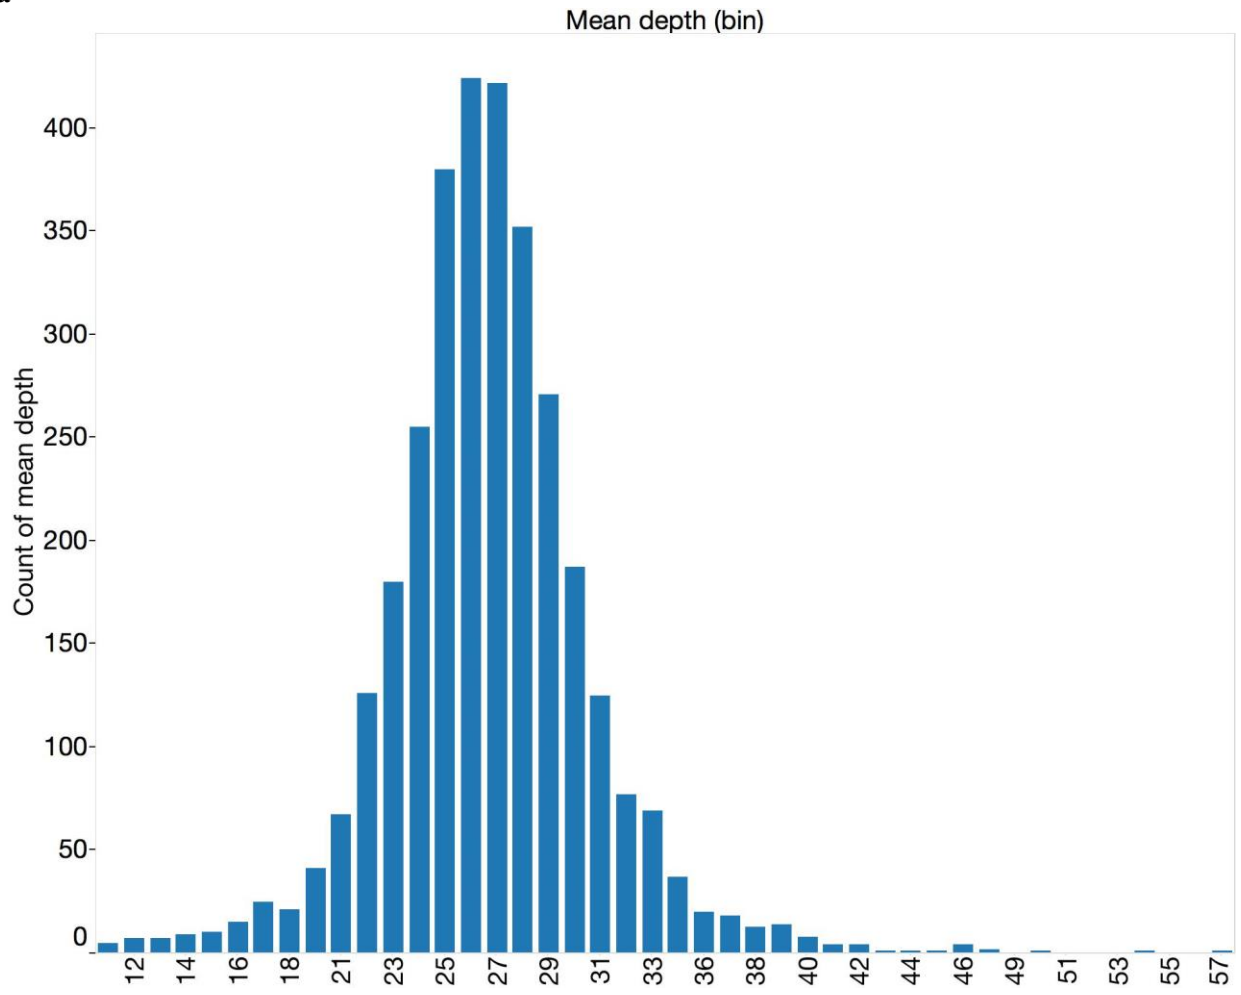

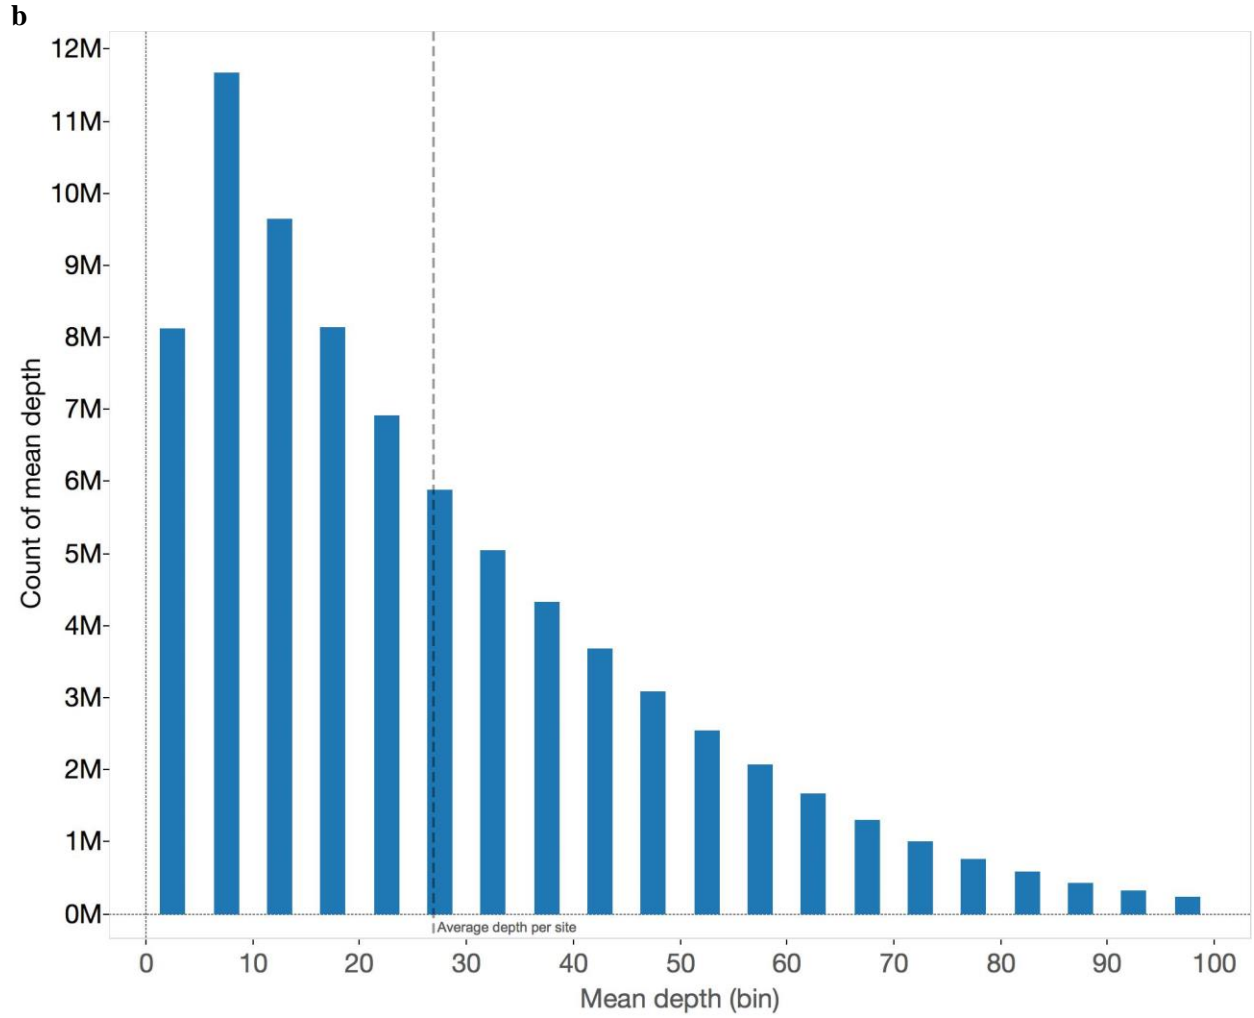

**Supplementary Figure 4. Mean depth across sites and individuals on the evaluated portion of the genome**

**a** Histogram of the distribution of mean depth per individual across all sites. **b** Histogram of the mean depth per site across all individuals.

|                  |                      | Self stated parental relatedness |                           |               |             |                |             |
|------------------|----------------------|----------------------------------|---------------------------|---------------|-------------|----------------|-------------|
|                  |                      | First cousin                     | First cousin once removed | Second cousin | Other blood | Other marriage | Do not know |
| Inferred Meiosis | 6 (First cousin)     | 835                              | 7                         | 33            | 29          | 2              | 528         |
|                  | 8 (Second cousin)    | 423                              | 1                         | 47            | 63          | 15             | 621         |
|                  | 10 (Third cousin)    | 78                               | 1                         | 13            | 17          | 11             | 356         |
|                  | >10 (Not considered) | 19                               | 0                         | 6             | 14          | 0              | 103         |

**Supplementary Table 1.** Most probable number of separating meioses giving rise to autozygous segment lengths as compared with those from self-stated parental relatedness.

|                  |                   | Pedigree ascertained relatedness |              |                           |               |              |
|------------------|-------------------|----------------------------------|--------------|---------------------------|---------------|--------------|
|                  |                   | Double First cousin              | First cousin | First cousin once removed | Second cousin | Third cousin |
| Inferred Meiosis | 6 (First cousin)  | 2                                | 46           | 2                         | 0             | 0            |
|                  | 8 (Second cousin) | 0                                | 2            | 0                         | 5             | 0            |
|                  | 10 (Third cousin) | 0                                | 0            | 0                         | 0             | 1            |

**Supplementary Table 2.** Most probable number of separating meioses giving rise to autozygous segment lengths as compared with those from well studied pedigrees.

| Allele Frequency | Percentage of sites identified correctly | Percentage of genotypes identified correctly | False negative rate | False positive rate |
|------------------|------------------------------------------|----------------------------------------------|---------------------|---------------------|
| Singleton        | 83.77                                    | NA                                           | 16.23               | 3.60                |
| 10%              | 94.55                                    | 97.22                                        | 8.23                | 1.05                |
| 20%              | 94.27                                    | 98.10                                        | 7.63                | 0.86                |
| 30%              | 93.91                                    | 98.17                                        | 7.92                | 0.94                |

**Supplementary Table 3.** Estimates of the false negative rates on the allele frequency based on our approach of altering reads to contain a new mutation then remapping them and recalling. Two components to the false negative rate are measured: first the percentage of introduced sites that failed to be called, and second the fraction of introduced heterozygous genotypes that failed to be called at a site that was already known to be polymorphic based on other individuals. The total false negative rate is reflected by aggregating both of these types of error.

| Class of mutation         | PJL | MDNM |
|---------------------------|-----|------|
| 5' CCG 3' → 5' CTG 3'     | 54  | 310  |
| not 5' CCG 3' → 5' CTG 3' | 795 | 6592 |

**Supplementary Table 4.** 2x2 table showing the number of mutations of the particular class, 5' CCG 3' → 5' CTG 3' in the PJL complete genomics trios and those from a set of meta de novo mutations ascertained in Europeans.



| <b>Dataset</b>                                                                                | <b>Total Number of DNMs</b> | <b>Type of sequencing</b>    | <b>Ancestry</b> |
|-----------------------------------------------------------------------------------------------|-----------------------------|------------------------------|-----------------|
| Autozygosity, this dataset (AZ)                                                               | 1152                        | 28x WES illumina HiSeq 2500  | Pakistani       |
| Scottish Family Health Study (SFHS) <sup>6</sup>                                              | 747                         | 30x WGS illumina HiSeq 2500  | European        |
| Meta de novo mutations <sup>6</sup>                                                           | 6902                        | Variable coverage WGS        | European        |
| PJL Complete Genomics Trios <sup>31</sup>                                                     | 850                         | 80x Complete genomics        | Pakistani       |
| Mutations private to Europeans in the 1000 Genomes Project excluding singletons <sup>12</sup> | 2452300                     | 7.4x WGS illumina HiSeq 2500 | European        |
| Mutations private to PJL in the 1000 Genomes Project excluding singletons <sup>12</sup>       | 162855                      | 7.4x WGS illumina HiSeq 2500 | Pakistani       |

**Supplementary Table 5.** Table showing a listing of various datasets their acronyms, the total number of DNMs seen and the sequencing technology used along with their ancestry.

## Supplementary Note 1

Equation 1:

$$P(\text{het in dup 2} \mid \text{het in dup 1}, \alpha, \beta, f) = \frac{P(\text{het in dup 2}, \text{het in dup 1} \mid \alpha, \beta, f)}{P(\text{het in dup 1} \mid \alpha, \beta, f)}$$

Equation 2:

$$\begin{aligned} &= \frac{P(\text{het in dup 1}, \text{het in dup 2} \mid \text{reality is hom alt}, \alpha, \beta, f)P(\text{reality is hom alt}) + P(\text{het in dup 1}, \text{het in dup 2} \mid \text{reality is het}, \alpha, \beta, f)P(\text{reality is het}) + P(\text{het in dup 1}, \text{het in dup 2} \mid \text{reality is ref}, \alpha, \beta, f)P(\text{reality is hom ref})}{P(\text{het in dup 1} \mid \text{reality is hom alt}, \alpha, \beta, f)P(\text{reality is hom alt}) + P(\text{het in dup 1} \mid \text{reality is het}, \alpha, \beta, f)P(\text{reality is het}) + P(\text{het in dup 1} \mid \text{reality is ref}, \alpha, \beta, f)P(\text{reality is hom ref})} \\ &= \frac{2f^2(1-\beta)^2 + 2f(1-f)(1-\alpha)^2(1-\beta)^2 + 2f(1-f)\alpha^2\beta^2 + 4f(1-f)(1-\alpha)(1-\beta)(\alpha\beta)}{2f^2(1-\beta) + 2f(1-f)(1-\alpha)(1-\beta) + 2f(1-f)(\alpha\beta) + 2(1-f)^2\alpha} \end{aligned}$$
